# Supplementary material for: Transcriptome-Based Identification and Molecular Evolution of the Cytochrome P450 Genes and Expression Profiling under Dimethoate Treatment in Amur Stickleback (Pungitius sinensis)
Source: MDPI journal article supplement (doi:10.3390/ani9110873), 2019-10-28
Supplement: s1 [file s1]

|             |                                           |                                            |                                        |                                            |
|-------------|-------------------------------------------|--------------------------------------------|----------------------------------------|--------------------------------------------|
| Psi_CYP4V   | -----SY-----S-VSVLGISLLIAAVTYLTYRLLSDV    | HKWVF-----MKPIPQAGTYPFIGNAHQFK             | NAGDF-----F-----RQIEDLTIEFSGEPLFKLWIGP | P-F                                        |
| Psi_CYP46A2 | -----MKFWSAE-----F-VGLLLLVCVGTGVLRTLL     | WLWWKPKKLEKLQSQGIKGT-YTILFGDLRLKLY         | QTKEAVSRPIDPFSNDILRRASPFSSQVVED        | -----CGGKLCYLWLGTS-P-I                     |
| Psi_CYP46A1 | MA-----LFQVFLSWTAACLFVAFL-I-----          | LCIGYCLVQVH-H-MK-----YDHIPGPPRDSFLFGHSATYA | AMRDG-----D-----I IHDRF-LEWAE          | -----KYGPCVCRQNFHLV-V                      |
| Psi_CYP5A   | METLVDVLNVFHIKTSGWSVTLSSLVLF              | LGLLYWYSIFPYSVL-----S-----                 | RCGIKHP-KPVPFGLGNIFMFR                 | GGFNP-----I-----NDLIK-THGRVCGYLLGR-P-V     |
| Psi_CYP3C1  | MFLFD-LFSATSW-----TLLALF-FTLMLLYGIWPYRFF  | -----K-----                                | HLGIKGP-RPLPFIGTLLYFR                  | GWVGF-----D-----RECQA-KYGDVWGTFDAR-P-V     |
| Psi_CYP3A69 | MGYFL-FFSVETW-----ILLITF-ICIFVIYGVKWTGCVF | -----E-----                                | NLGIPGP-KPYTYVGTGVRHS                  | VYVED-----D-----QCCAK-KYGVKVMGYEFRSP-M     |
| Psi_CYP3A   | MGFLP-ELSVETW-----TLIVFF-VTLVTYGYAPYGGF   | -----K-----                                | KLGIKGP-KPLPFIGTFLEYR                  | GIHNF-----D-----TECYE-KYGVKVMGYDGRTP-V     |
| Psi_CYP3C2  | MGFSL-FFSAETW-----TLLVAL-VTLLFVYVCMWNGIF  | -----K-----                                | KLGVPGP-KPIPFPGTMLAYR                  | GGTFNF-----D-----EDCSK-KYGRVWGIYDFGR-P-V   |
| Psi_CYP4F2  | SLPLVLVSWTGPCQVLLVLGS-GLGAVVAFWITRLRLRH   | WYTHR-----L-----                           | LSCFSKPHANSWLLGHLGQM                   | QSEEGL-----L-----QVD-DLVQ-KYTHSCSWFLGP-YHL |
| Psi_CYP4B1  | -----WPRTHHWAAVTALCLVAA-----              | VYKLAALLAQRH                               | HALRN-----D-----AESFPGP-RAHWLFGNVREFK  | DGNDL-----D-----RVV-KWGK-HDPYAFPIWFGP-VCF  |

A

B

|             |                        |                           |          |           |                         |                                    |             |                                   |                                  |                |          |              |           |              |        |            |          |         |           |           |      |      |      |       |      |      |     |     |     |     |
|-------------|------------------------|---------------------------|----------|-----------|-------------------------|------------------------------------|-------------|-----------------------------------|----------------------------------|----------------|----------|--------------|-----------|--------------|--------|------------|----------|---------|-----------|-----------|------|------|------|-------|------|------|-----|-----|-----|-----|
| Psi_CYP4V   | LILFHAETVEAILTN-SVHMK  | KSYSY-----TFLHPWLJKGLLTS  | TGNK     | WRQR      | RKMLTPTFHFSILTDFLDMNEQA | AAVLVEKLEKQ-AG                     | G           | EFDSFSHITLCALDIICETAMGKKIHAQSHS   | DSEYV                            | SV             |          |              |           |              |        |            |          |         |           |           |      |      |      |       |      |      |     |     |     |     |
| Psi_CYP46A2 | VIVTDPKLVREIMCDKS-GH   | DKTPS-----HPLGGYLLNGLVNL  | CGQK     | WYDR      | RKINPVPFHV              | DKLKMYGAFSCCCSELIDRWEKL            | LDS         | ESVELDVWPELENLTGDIISRAFGSSYLEGRRI | -----F                           | QL             |          |              |           |              |        |            |          |         |           |           |      |      |      |       |      |      |     |     |     |     |
| Psi_CYP46A1 | ILVSCPEGTKELMSQKYS     | KDRFFYKKIFSLFGGRFLGNGLVTS | QNH      | EQ        | WYKQ                    | RRIMDPAFSSLYRLGLIGTFNERVERLMTKLSDV | ADN         | CT                                | EAGMLKLVNFLTLDVIAKVAFGVLDRLKDRSL | -----FPKAV     |          |              |           |              |        |            |          |         |           |           |      |      |      |       |      |      |     |     |     |     |
| Psi_CYP5A   | VVIADPDMRLQVMVRD-FSSFT | NRMTL-----RFASKPMTDCLLM   | L-RNER   | WKR       | VRSILTPSFS              | AAKMR                              | EMVPLINTVTD | SLMSNLVNS-AES                     | SE                               | AFDIHKCFGCF    | TMDVIA   | SAFGTQVDSQKN | PDD       | PFV          | HA     |            |          |         |           |           |      |      |      |       |      |      |     |     |     |     |
| Psi_CYP3C1  | LMVADPEI               | IKTVL                     | KECFSVFT | NRRDN     | -----PAA-GPL            | ADAITAV                            | KDER        | WKR                               | MSTLSPCFTSGRMQ                   | IFPIVARY       | ADRLTEN  | LG           | -----THSV | PIDVKQFMAPYS | LDVVTS | SASFGIEANM | NPD      | PLN     | HL        |           |      |      |      |       |      |      |     |     |     |     |
| Psi_CYP3A69 | LAVMDPDM               | LKTIL                     | VKECF    | TYFT      | NRRNI                   | -----RLN-GDL                       | YDSVSTV     | EDD                               | WRI                              | RNVLTSPSTSGHI  | KEMPRIM  | KHLSK        | ASLQSK    | AGN          | NE     | VVTIKDYF   | GAYSVDLM | ASCAFGV | MDL       | INN       | SS   | P    | IV   | HL    |      |      |     |     |     |     |
| Psi_CYP3A   | LATMDTAM               | IKSIL                     | VKECYS   | NFT       | NRRDF                   | -----GLN-GAL                       | DAITV       | V-DEE                             | WKR                              | IRSILSPSFTSGRL | KEMYSIM  | LQHSS        | NLIKSLHKK | AE           | AE     | VVDVKD     | IFGPYSMD | VVTSTAF | SV        | DI        | INN  | PSD  | PFV  | NI    |      |      |     |     |     |     |
| Psi_CYP3C2  | LCITDPAM               | IKTIL                     | KECYS    | LFT       | NRRNF                   | -----RLN-GQL                       | YDAVSIA     | EDD                               | WKR                              | IRSILSPSFTSGRL | KEMFIM   | KHHSAN       | L         | TSSMKKK      | ADK    | E          | PLELKEFF | GPYSMD  | VVTSTAF   | SV        | DI   | INN  | PSD  | PFV   | NI   |      |     |     |     |     |
| Psi_CYP4F2  | VRLFHPDYV              | KPLLM                     | APASITM  | KDEL      | IY                      | -----GHLR                          | PWLGGSLLS   | -----NGEE                         | WSR                              | RRRLTPAF       | HF       | DLKTY        | AAFKNTS   | NTL          | LDHNR  | HAVA       | AE       | GS      | -----ALEM | FDHVT     | MTL  | DSL  | LRCA | FSD   | SNCR | ST   | SEY | SAL |     |     |
| Psi_CYP4B1  | LNIHHPDY               | VKT                       | VWTS     | -----SEPK | DRVAY                   | -----SFIE                          | AWIEG       | GLVS                              | -----GQK                         | WFR            | HRRLLTPG | FHYE         | VLKPY     | VDLMSD       | STV    | TMLDK      | WERY     | AKS     | NE        | -----SFEL | FEHV | SLMT | LDS  | ILKCA | FSD  | SHCQ | TES | ST  | NAY | IAV |

SRS1

SRS2

C

C-Helix region

D

E

|             |           |        |          |         |         |           |         |           |      |         |          |      |           |          |      |            |       |       |          |          |      |     |      |         |     |     |    |   |   |   |   |    |     |   |   |   |          |   |   |   |   |   |   |    |      |       |
|-------------|-----------|--------|----------|---------|---------|-----------|---------|-----------|------|---------|----------|------|-----------|----------|------|------------|-------|-------|----------|----------|------|-----|------|---------|-----|-----|----|---|---|---|---|----|-----|---|---|---|----------|---|---|---|---|---|---|----|------|-------|
| Psi_CYP4V   | YKMSDIVSR | RQRT   | PWF      | PDFVY   | CFGE    | -----GREH | RTLKVL  | HSFTH     | KVIE | QEAASVS | AGDP     | SDSE | QGA       | KKR      | PAF  | -----DMLLK | ----- | TTYDD | GSR      | MSH      |      |     |      |         |     |     |    |   |   |   |   |    |     |   |   |   |          |   |   |   |   |   |   |    |      |       |
| Psi_CYP46A2 | QTEQVELL  | IQAVRS | IYIP     | GLK     | FPTR    | -----NNRR | RKEID   | SEV       | CDL  | RGII    | KKREQ    | SIA  | -----TNPA | STSS     | ASH  | DDL        | LGFL  | MDS   | -----NSN | QETT     | GITT |     |      |         |     |     |    |   |   |   |   |    |     |   |   |   |          |   |   |   |   |   |   |    |      |       |
| Psi_CYP46A1 | QTCLKGM   | VFSV   | -----RDS | FFV     | VNPK    | NPFI      | KEV     | -----REAC | RLRT | TGAQ    | WIK      | DRKT | AME       | -----NGI | DVP  | NDI        | LQI   | IKTS  | SVK      | -----EES | MTE  | EDE |      |         |     |     |    |   |   |   |   |    |     |   |   |   |          |   |   |   |   |   |   |    |      |       |
| Psi_CYP5A   | QMF       | FS     | SFF      | RPI     | ML      | -----FF   | AFF     | PI        | TAP  | AR      | FLPN     | KRRD | QMN       | HFF      | INII | QKI        | IK    | QRE   | -----QPA | ERR      | RDF  |     |      |         |     |     |    |   |   |   |   |    |     |   |   |   |          |   |   |   |   |   |   |    |      |       |
| Psi_CYP3C1  | KNILN     | FRL    | WP       | -----II | -----IL | IFP       | FGAR    | LL        | TLL  | KLE     | MDR      | VS   | DY        | FY       | DVI  | KRF        | KH    | Q     | -----KDI | ATRA     | DF   |     |      |         |     |     |    |   |   |   |   |    |     |   |   |   |          |   |   |   |   |   |   |    |      |       |
| Psi_CYP3A69 | SRFF      | KIP    | -----K   | FVFI    | -----LQ | IF        | P       | LL        | IPL  | FELL    | G        | SFF  | SPT       | STA      | FFK  | TLL        | AKI   | KA    | REG      | -----SS  | KNS  | GDL |      |         |     |     |    |   |   |   |   |    |     |   |   |   |          |   |   |   |   |   |   |    |      |       |
| Psi_CYP3A   | KKLV      | KFT    | TFL      | TPL     | FV      | -----LL   | LP      | F         | LP   | VLD     | KMD      | VTL  | SA        | ELL      | DF   | YFN        | LK    | KIS   | DRN      | -----NE  | KNR  | V   |      |         |     |     |    |   |   |   |   |    |     |   |   |   |          |   |   |   |   |   |   |    |      |       |
| Psi_CYP3C2  | KKML      | K      | DF       | FS      | PI      | FL        | -----IV | FP        | FL   | GP      | VM       | KE   | MF        | SFF      | PK   | SV         | TDF   | F     | YAA      | LQ       | KIK  | S   | NRVH | -----SE | K   | SRV | DF |   |   |   |   |    |     |   |   |   |          |   |   |   |   |   |   |    |      |       |
| Psi_CYP4F2  | VELSERI   | I      | ERR      | HK      | IL      | HHW       | D       | FY        | NK   | TEQ     | -----GRR | FR   | KAL       | GIV      | HS   | FTRE       | VQ    | KRR   | AL       | IN       | Q    | T   | K    | S       | ADL | TRA | Q  | R | K | D | F | VD | ILL |   |   |   |          |   |   |   |   |   |   |    |      |       |
| Psi_CYP4B1  | YELSYL    | INL    | R        | FR      | T       | F         | YH      | S         | DL   | I       | FL       | SPH  | -----GFR  | FR       | KAR  | K          | VA    | HS    | T        | E        | E    | V   | I    | R       | K   | R   | E  | A | L | G | V | N  | R   | P | D | G | -----TRA | K | R | N | L | D | F | LD | ILLS | ----- |

SRS3

SRS4

F

G

|             |     |     |    |   |   |    |     |     |    |      |       |      |     |     |    |     |     |   |   |     |     |          |    |   |   |   |   |   |   |   |   |   |    |   |   |   |   |        |    |   |        |        |   |        |        |        |    |   |        |   |   |   |    |   |   |    |   |   |    |    |   |    |        |    |    |    |   |   |   |   |   |   |        |        |        |        |        |        |   |        |        |        |        |        |   |   |   |   |   |   |   |   |   |   |        |   |   |   |   |        |   |        |        |        |    |        |        |        |        |   |        |   |   |   |   |   |        |   |        |        |        |        |   |        |
|-------------|-----|-----|----|---|---|----|-----|-----|----|------|-------|------|-----|-----|----|-----|-----|---|---|-----|-----|----------|----|---|---|---|---|---|---|---|---|---|----|---|---|---|---|--------|----|---|--------|--------|---|--------|--------|--------|----|---|--------|---|---|---|----|---|---|----|---|---|----|----|---|----|--------|----|----|----|---|---|---|---|---|---|--------|--------|--------|--------|--------|--------|---|--------|--------|--------|--------|--------|---|---|---|---|---|---|---|---|---|---|--------|---|---|---|---|--------|---|--------|--------|--------|----|--------|--------|--------|--------|---|--------|---|---|---|---|---|--------|---|--------|--------|--------|--------|---|--------|
| Psi_CYP4V   | RD  | QEE | VD | T | F | FM | RGH | DTT | AS | SMNW | AVHLL | LGSH | PEA | HSK | VQ | QEL | QEV | F | G | SSD | RPV | -----MED | LK | K | L | K | L | E | C | V | I | K | EA | L | R | L | F | -----F | SV | P | F      | AR     | N | I      | GED    | CHI    | NG | F | K      | V | P | K | AN | A | I | V  | T | Y | AV | H  | R | D  | -----Y | PE | PD | AF | R | P | R | F | L | P | EN     | -----S |        |        |        |        |   |        |        |        |        |        |   |   |   |   |   |   |   |   |   |   |        |   |   |   |   |        |   |        |        |        |    |        |        |        |        |   |        |   |   |   |   |   |        |   |        |        |        |        |   |        |
| Psi_CYP46A2 | DEM | I   | G  | E | C | K  | L   | F   | Y  | F    | AGQ   | E    | T   | T   | S  | LN  | WT  | L | V | L   | S   | M        | P  | N | W | Q | H | L | A | R | Q | E | V  | L | Q | V | C | R      | K  | Q | -----P | F      | S | D      | M      | N      | Q  | L | K      | I | V | T | M  | L | Y | EV | L | R | L  | Y  | P | P  | V      | L  | F  | L  | A | M | A | H | A | M | N      | I      | -----G | G      | Y      | S      | F | P      | S      | G      | M      | E      | F | R | L | P | I | L | T | M | H | D | -----P | L | W | G | D | D      | V | K      | E      | F      | K  | P      | E      | R      | F      | S | Q      | G | I | S | K |   |        |   |        |        |        |        |   |        |
| Psi_CYP46A1 | EL  | M   | L  | D | N | F  | T   | F   | F  | I    | AGH   | E    | T   | T   | A  | N   | LA  | F | C | I   | M   | E        | L  | T | R | R | P | D | I | E | K | M | K  | E | V | D | V | G      | M  | K | Q      | -----D | I | S      | Y      | D      | D  | L | G      | K | L | I | Y  | L | S | Q  | V | L | K  | ET | L | R  | M      | Y  | P  | A  | P | G | T | S | R | D | -----V | L      | E      | D      | I      | V      | I | -----D | G      | I      | H      | I      | P | G | G | V | T | C | F | F | S | S | Y      | V | C | G | R | M      | D | -----F | F      | F      | K  | D      | -----P | L      | T      | F | D      | P | R | F | H | P | D      | A | -----  |        |        |        |   |        |
| Psi_CYP5A   | DE  | I   | V  | G | A | F  | V   | F   | L  | AGY  | E     | T    | S   | S   | N  | T   | LA  | F | T | C   | Y   | L        | L  | A | I | N | P | E | C | R | K | V | Q  | R | E | V | D | E      | F  | F | S      | R      | H | E      | -----S | P      | Y  | T | N      | V | Q | E | L  | K | Y | L  | D | M | V  | I  | S | ET | L      | R  | L  | Y  | P | P | G | F | R | A | R      | D      | -----I | D      | Q      | D      | C | V      | L      | -----N | G      | Q      | F | L | P | K | G | A | T | E | I | P | A      | G | F | L | H | Y      | D | -----H | W      | T      | E  | -----P | E      | R      | F      | I | P      | E | R | F | T | P | E      | A | -----K |        |        |        |   |        |
| Psi_CYP3C1  | HE  | I   | L  | S | Q | A  | L   | I   | F  | I    | GGY   | E    | T   | T   | S  | T   | TL  | F | L | L   | N   | L        | A  | I | N | P | D | A | M | R | T | L | Q  | E | E | I | D | A      | N  | I | P      | R      | D | A      | -----P | L      | Y  | E | D      | V | G | L | Q  | Y | L | D  | Q | V | L  | ES | Q | R  | L      | I  | P  | T  | A | P | R | L | E | R | V      | -----C | K      | K      | T      | T      | Q | V      | -----H | G      | L      | T      | I | P | K | G | T | L | V | G | I | P | N      | L | H | T | D | -----P | F | W      | SS     | -----P | Q  | L      | F      | R      | P      | E | R      | F | S | K | E | G | -----G |   |        |        |        |        |   |        |
| Psi_CYP3A69 | HE  | I   | L  | T | Q | A  | T   | M   | F  | M    | AGY   | E    | T   | S   | A  | T   | TL  | A | F | L   | A   | N        | L  | A | R | N | P | E | V | M | K | R | L  | Q | E | E | I | D      | A  | T | F      | P      | D | K      | G      | -----A | V  | Y | E      | E | L | V | Q  | M | E | Y  | L | D | S  | V  | N | ES | L      | R  | L  | Y  | P | P | A | G | R | L | D      | R      | V      | -----A | K      | K      | T | V      | E      | I      | -----R | G      | I | T | I | P | K | D | M | I | V | V | I      | P | Y | A | L | H      | R | D      | -----P | L      | W  | PE     | -----P | E      | E      | F | R      | P | E | R | F | S | K      | Q | N      | -----K |        |        |   |        |
| Psi_CYP3A   | SE  | I   | L  | S | Q | A  | M   | I   | F  | I    | AGY   | E    | T   | S   | S  | G   | TL  | G | L | A   | Y   | N        | L  | A | T | H | P | D | I | Q | K | T | L  | Q | E | E | I | D      | E  | T | F      | P      | N | K      | A      | -----R | P  | Y | D      | A | L | M | Q  | M | E | Y  | L | D | M  | V  | N | ES | M      | R  | L  | Y  | P | S | G | N | R | L | D      | R      | V      | -----S | K      | S      | S | V      | E      | I      | -----E | G      | V | T | I | P | K | G | T | V | M | I | P      | V | T | L | H | R      | E | -----P | L      | W      | PE | -----P | D      | A      | F      | K | P      | E | R | F | S | K | E      | N | -----K |        |        |        |   |        |
| Psi_CYP3C2  | HE  | I   | L  | S | Q | A  | M   | I   | F  | L    | AGY   | E    | T   | S   | S  | S   | SL  | T | F | L   | A   | N        | L  | A | T | N | P | D | I | M | K | R | L  | Q | E | E | V | D      | S  | T | F      | P      | N | K      | G      | -----P | V  | Y | Q      | A | L | M | Q  | M | E | Y  | L | D | S  | V  | I | N  | ES     | L  | R  | L  | Y | P | I | A | P | R | L      | E      | R      | V      | -----A | K      | A | T      | V      | E      | I      | -----N | G | I | V | I | P | K | M | V | M | V | M      | P | T | W | P | L      | H | R      | D      | -----P | L  | W      | PE     | -----P | E      | A | F      | K | P | E | R | F | S      | K | E      | N      | -----K |        |   |        |
| Psi_CYP4F2  | BE  | V   | Q  | A | E | A  | N   | T   | F  | M    | AGH   | D    | T   | T   | A  | S   | A   | I | C | W   | T   | L        | N  | L | A | R | H | E | H | Y | Q | E | K  | R | Q | E | V | M      | D  | L | M      | Q      | R | D      | R      | H      | K  | I | -----W | E | D | L | S  | N | L | P  | T | T | M  | C  | I | R  | ES     | L  | R  | L  | Y | P | A | P | Q | A | V      | T      | R      | K      | Y      | -----T | R | D      | M      | A      | L      | P      | G | H | R | T | V | P | A | G | A | I | C      | L | V | S | I | Y      | G | T      | H      | N      | P  | -----V | W      | W      | T      | D | -----P | H | E | F | N | P | E      | R | F      | D      | P      | A      | R | -----S |
| Psi_CYP4B1  | ED  | L   | R  | A | E | V  | D   | T   | F  | M    | EGH   | D    | T   | T   | A  | S   | GL  | S | F | I   | L   | S        | L  | A | C | P | E | H | Q | R | L | C | R  | E | E | I | R | T      | L  | D | G      | R      | D | -----T | L      | S      | W  | E | D      | L | G | K | I  | P | Y | T  | T | M | C  | I  | K | ES | L      | R  | L  | Y  | P | P | V | P | G | T | S      | R      | V      | -----T | T      | K      | P | M      | T      | F      | D      | G      | R | T | L | E | A | G | L | V | G | T | S      | V | F | G | I | H      | R | N      | A      | -----V | W  | W      | E      | N      | -----P | N | V      | F | D | P | L | R | F      | L | P      | E      | N      | -----V |   |        |

H I-Helix region

I

J

K-Helix region

PERF motif region

SRS6

|             |         |      |    |     |     |    |   |   |   |    |    |   |   |   |   |   |   |   |   |   |   |   |     |   |   |   |   |   |   |   |   |           |   |   |   |   |   |   |   |   |   |        |   |   |   |        |   |   |   |   |   |   |   |   |   |   |       |
|-------------|---------|------|----|-----|-----|----|---|---|---|----|----|---|---|---|---|---|---|---|---|---|---|---|-----|---|---|---|---|---|---|---|---|-----------|---|---|---|---|---|---|---|---|---|--------|---|---|---|--------|---|---|---|---|---|---|---|---|---|---|-------|
| Psi_CYP4V   | AGRPPY  | AYIP | FS | AGL | RNC | IG | Q | R | F | A  | L  | M | E | E | K | V | V | L | A | I | L | R | N   | F | N | I | E | A | C | Q | K | -----REEL | P | V | G | E | L | I | L | R | P | -----P | E | N | G | I      | W | I | K | E | K | R | K | R | Q | T | ----- |
| Psi_CYP46A2 | AT      | K    | N  | K   | M   | I  | F | F | P | FG | A  | G | S | R | T | C | I | G | Q | S | F | A | M   | E | A | R | L | G | A | M | I | L         | Q | R | F | K | F | E | L | S | P | S      | Y | L | H | -----A | P | F | F | L | T | L | H | P | Q | H | ----- |
| Psi_CYP46A1 | -----PK | P    | F  | C   | Y   | C  | Y | P | F | F  | AL | G | P | R | A | C | L | G | N | F | A | Q | M</ |   |   |   |   |   |   |   |   |           |   |   |   |   |   |   |   |   |   |        |   |   |   |        |   |   |   |   |   |   |   |   |   |   |       |
