# Supplementary figures and images for: Transcriptome-Based Identification and Molecular Evolution of the Cytochrome P450 Genes and Expression Profiling under Dimethoate Treatment in Amur Stickleback (Pungitius sinensis)
Source: MDPI journal article supplement (doi:10.3390/ani9110873), 2019-10-28

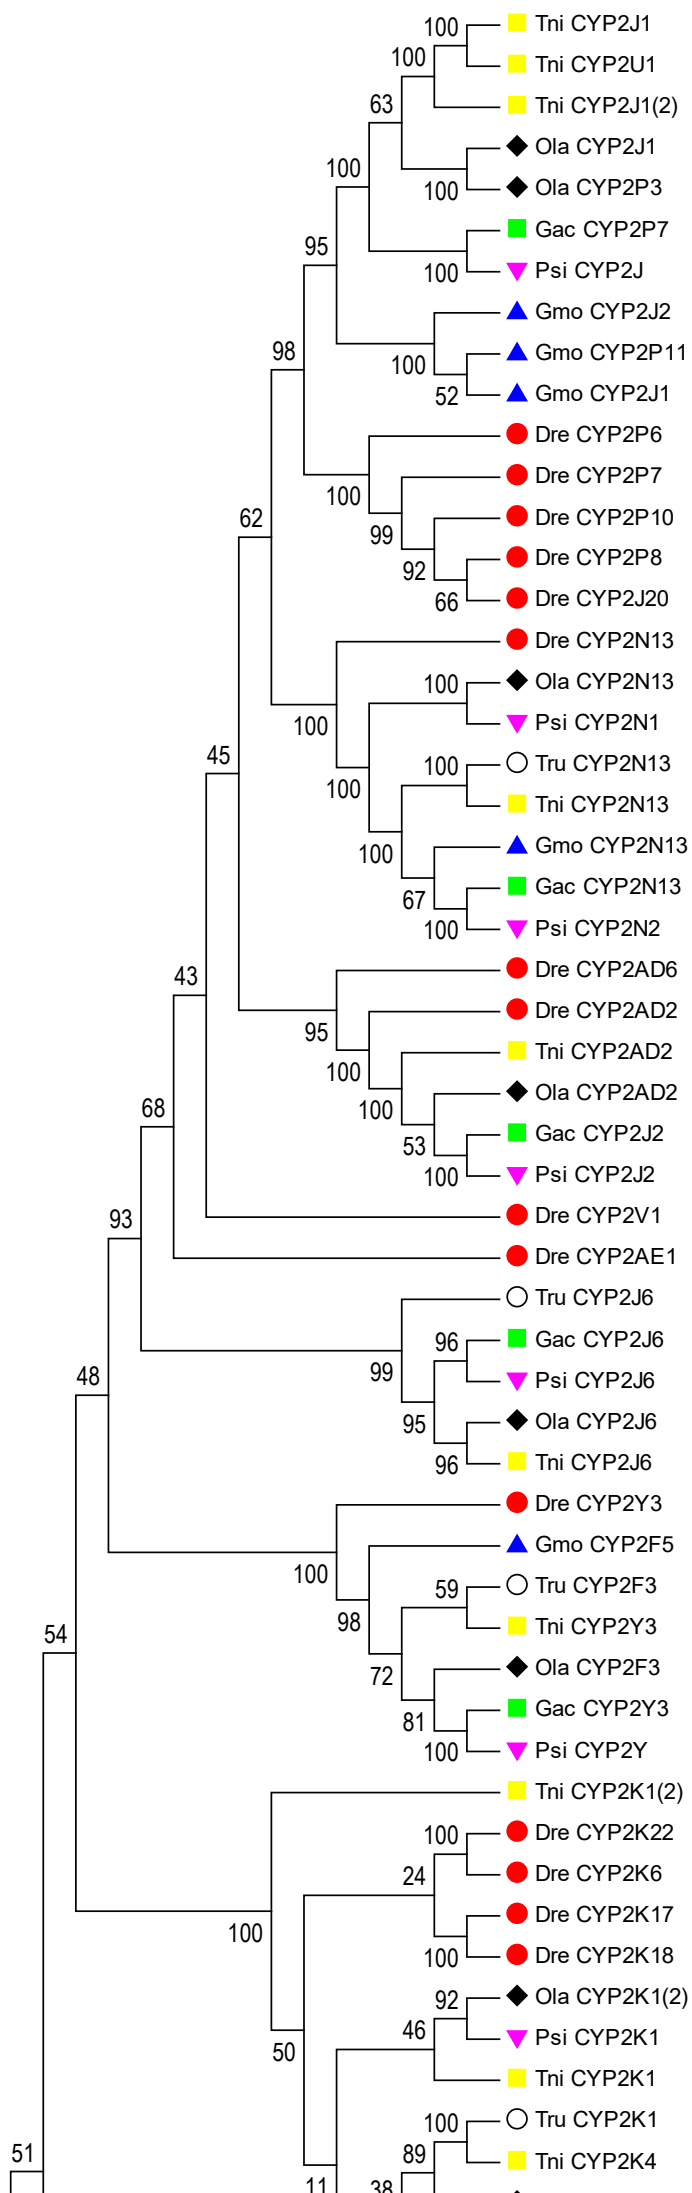

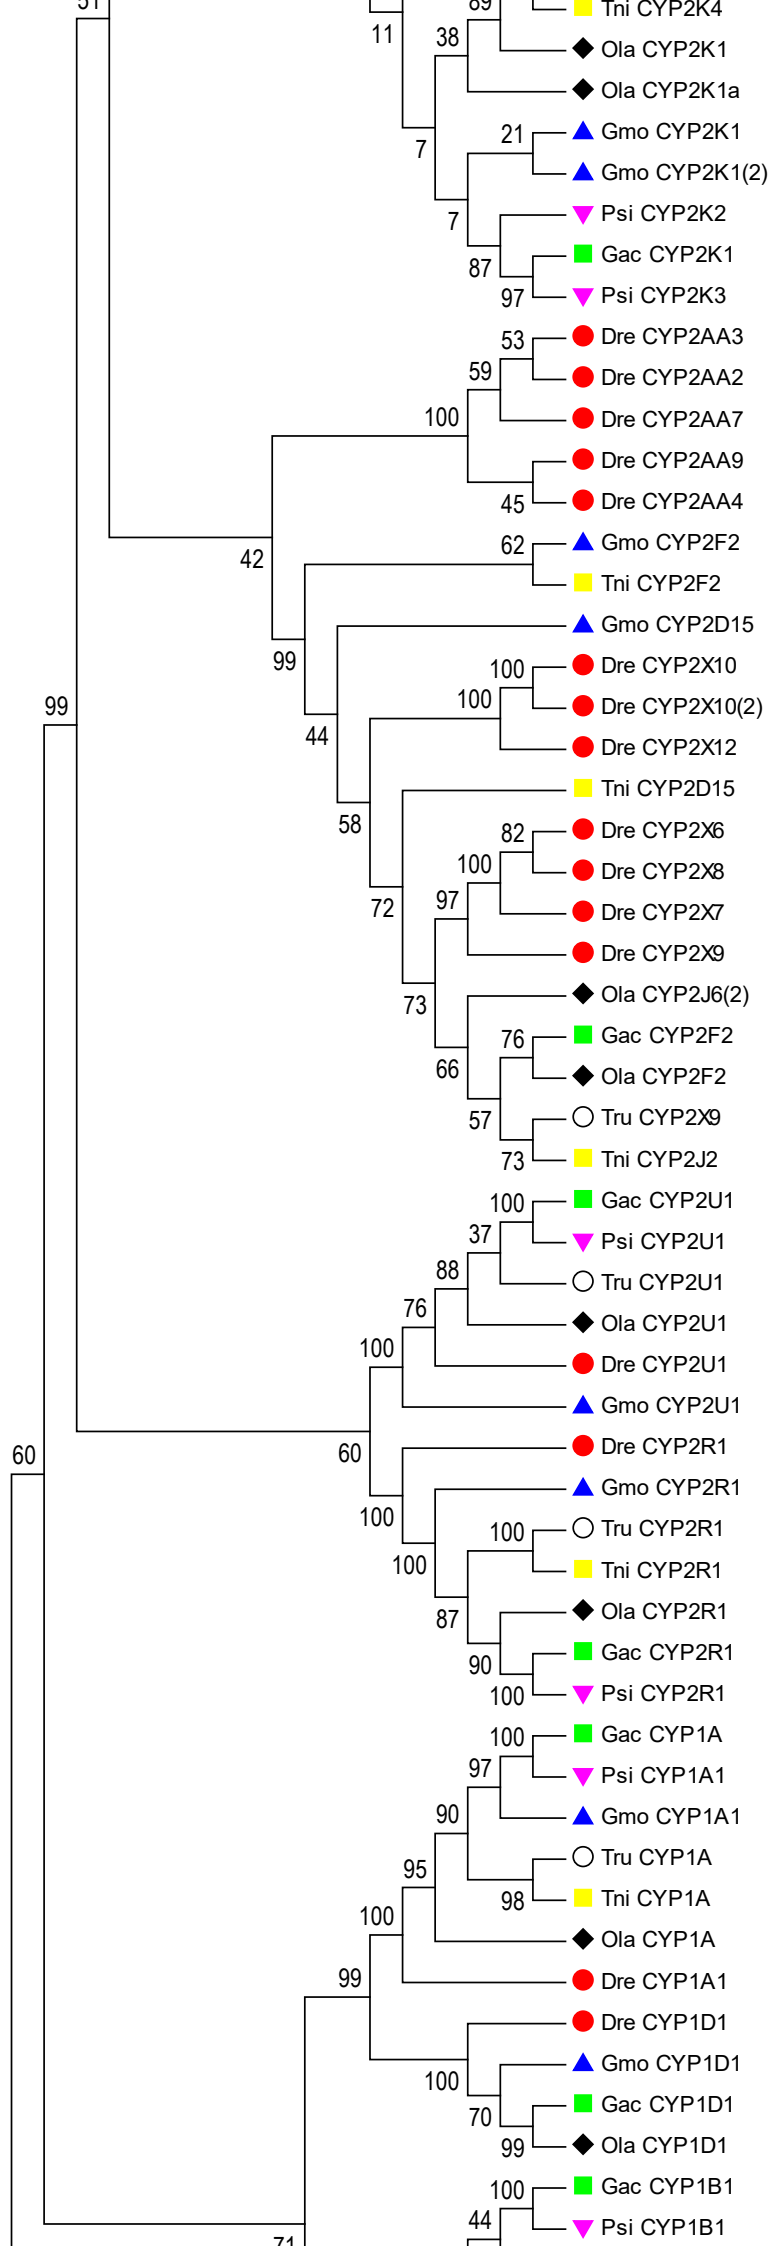

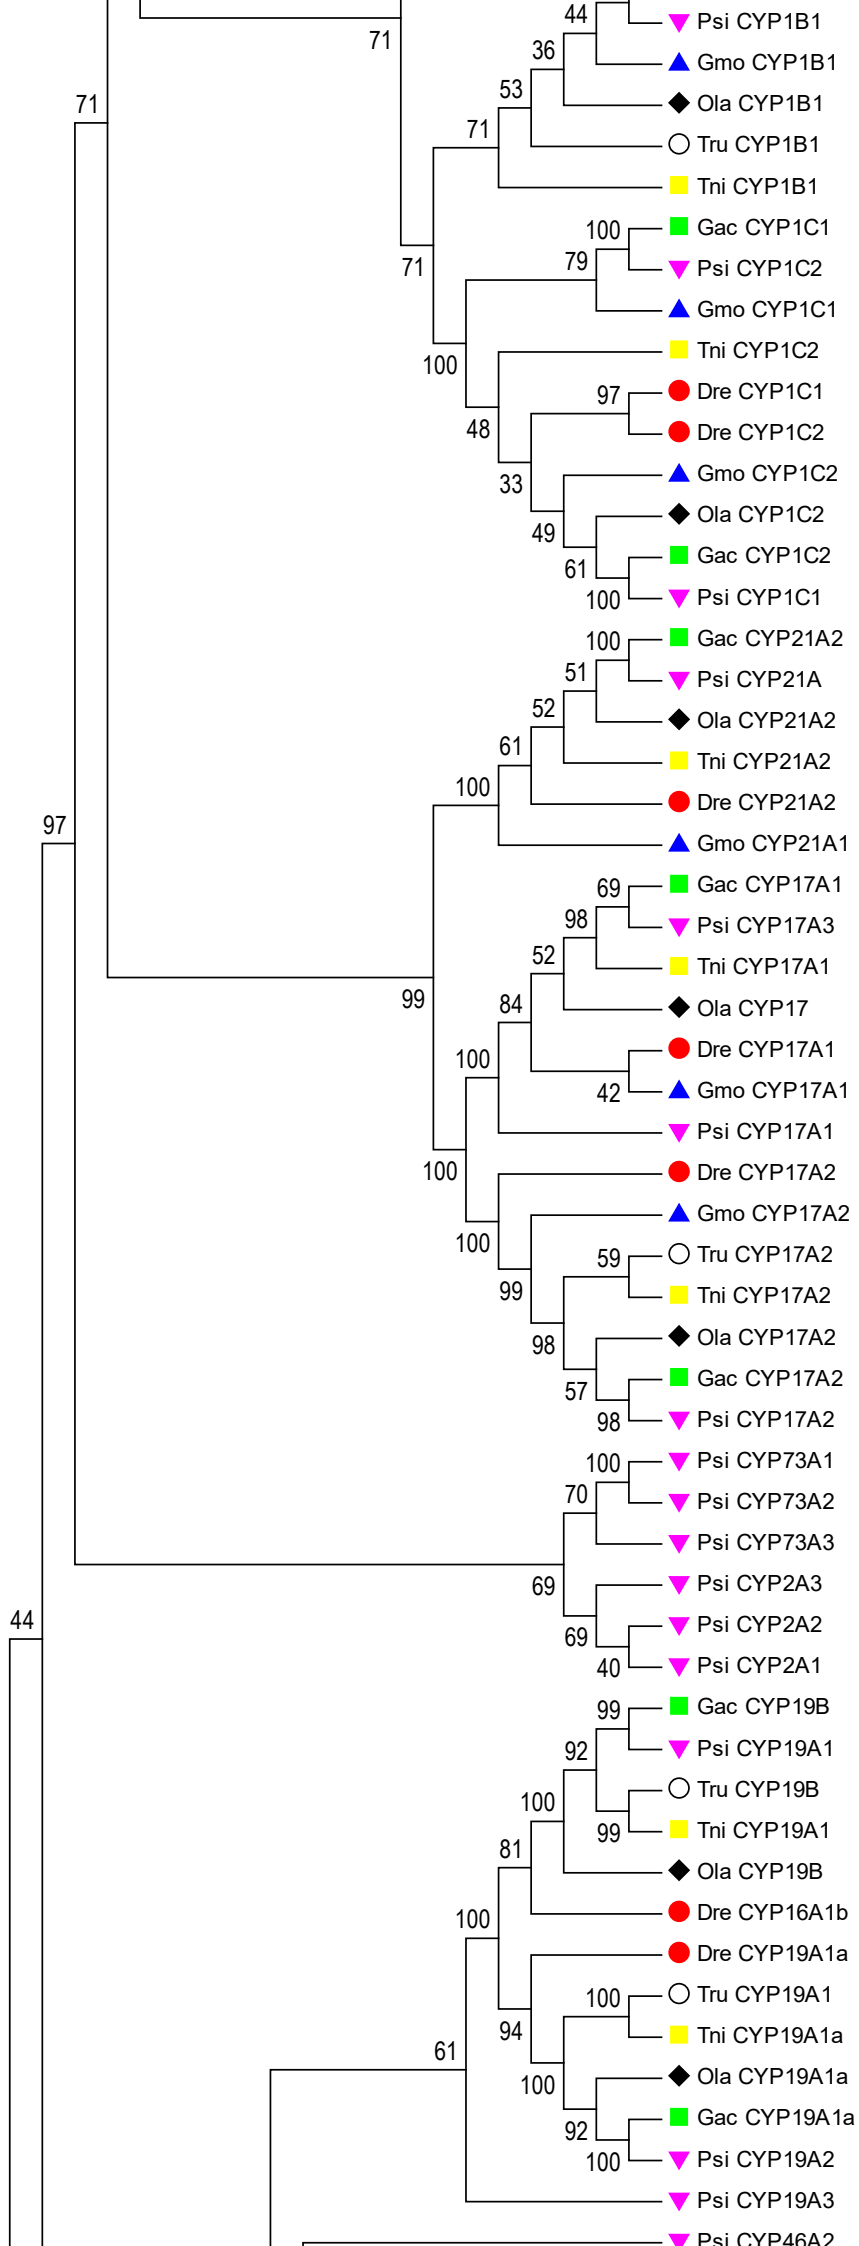

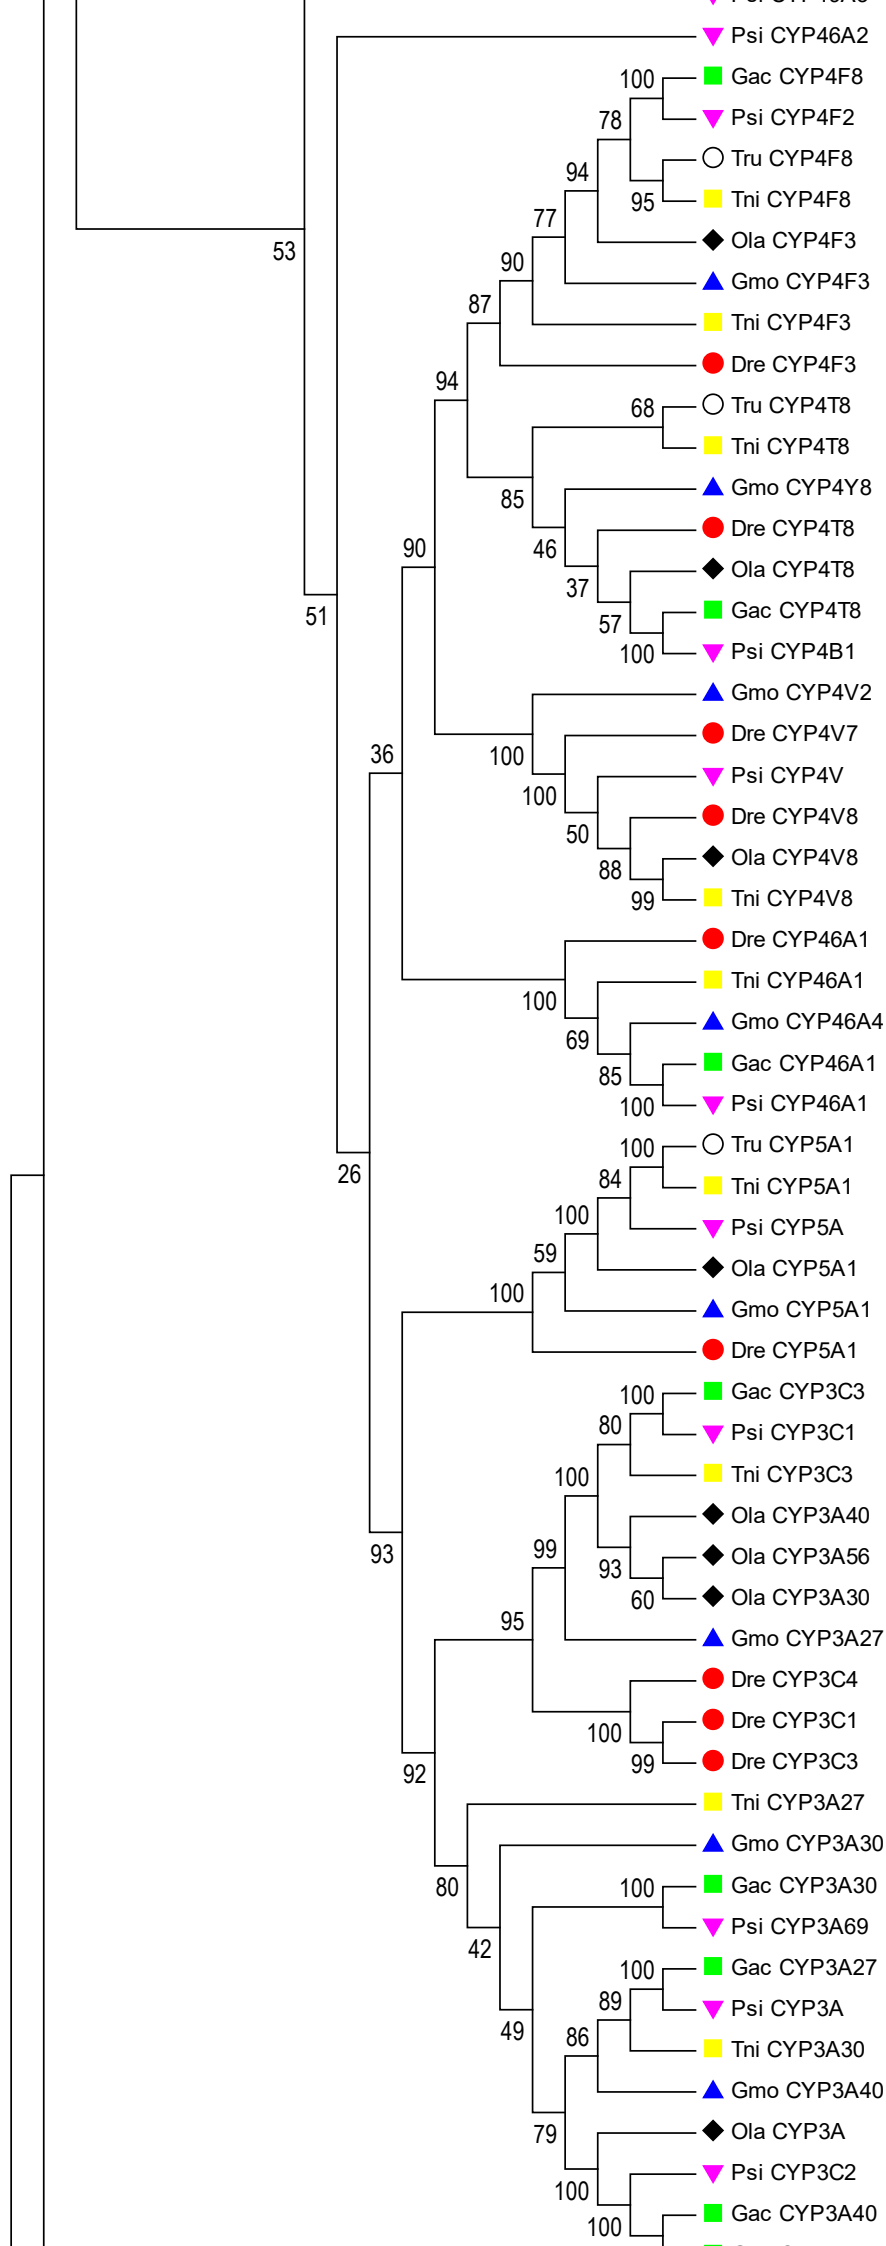

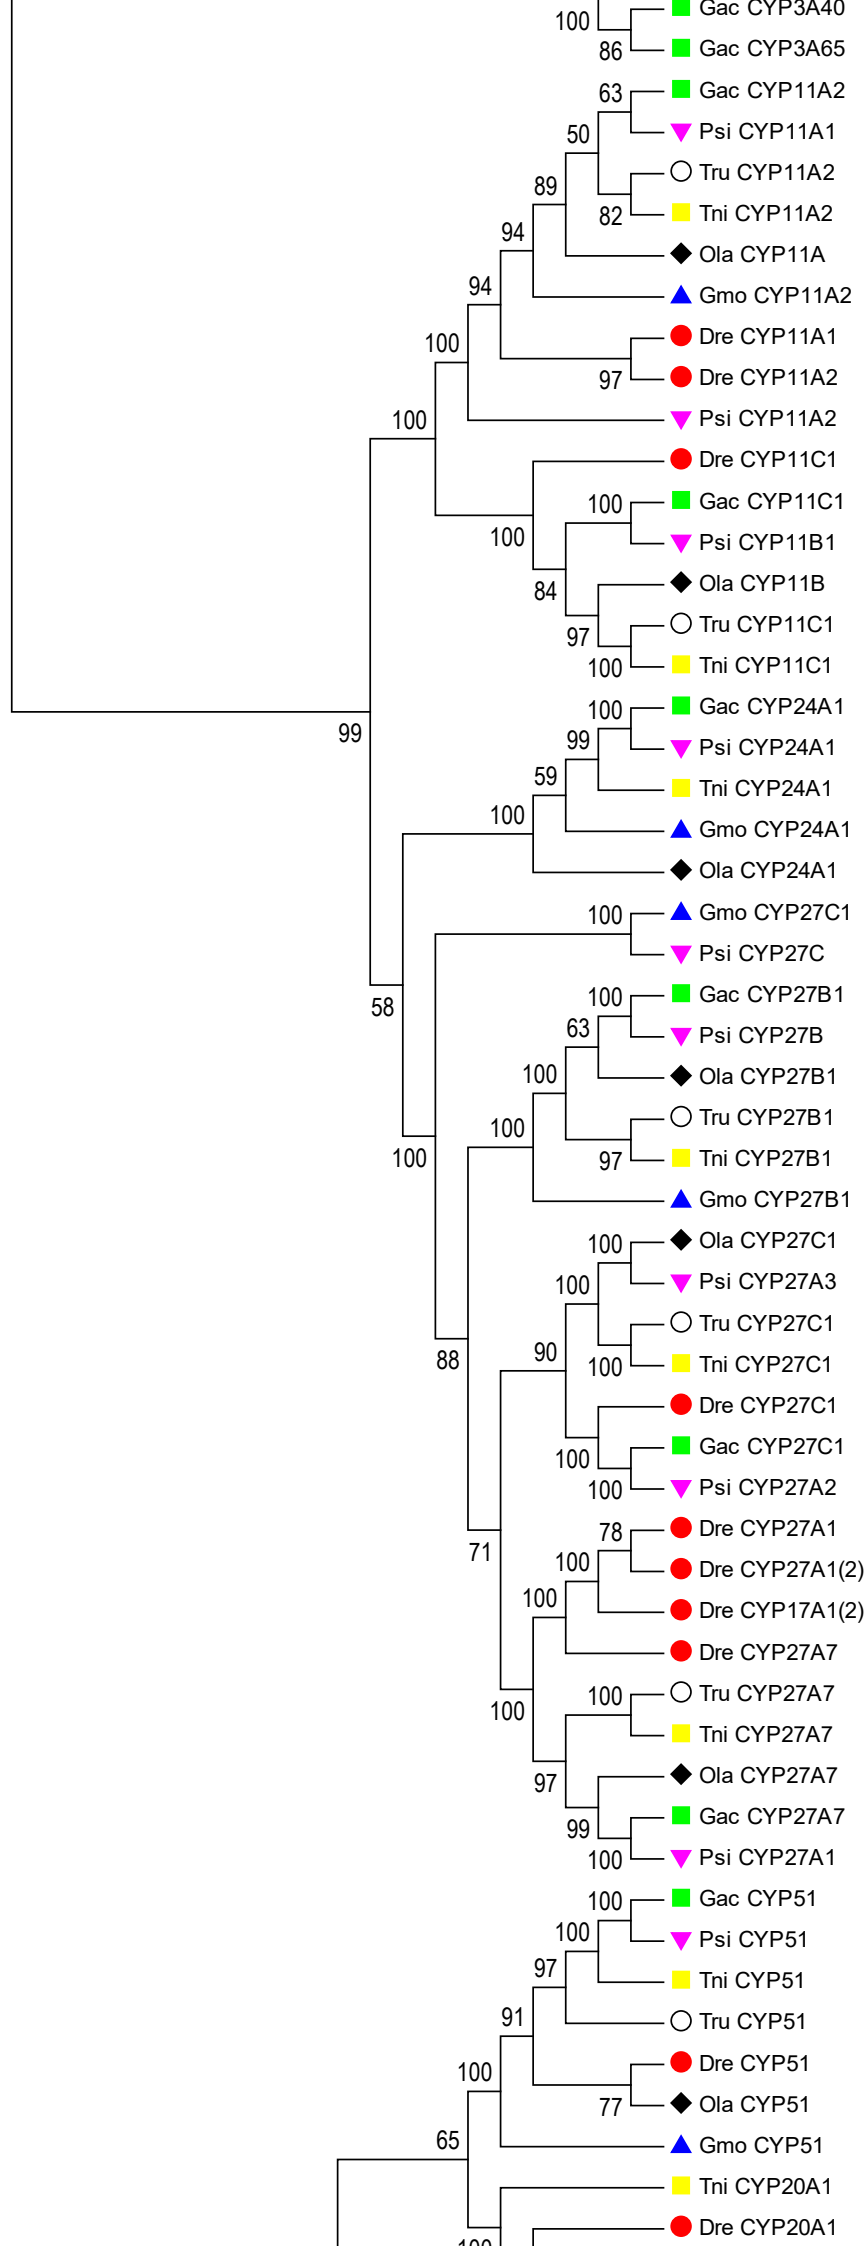

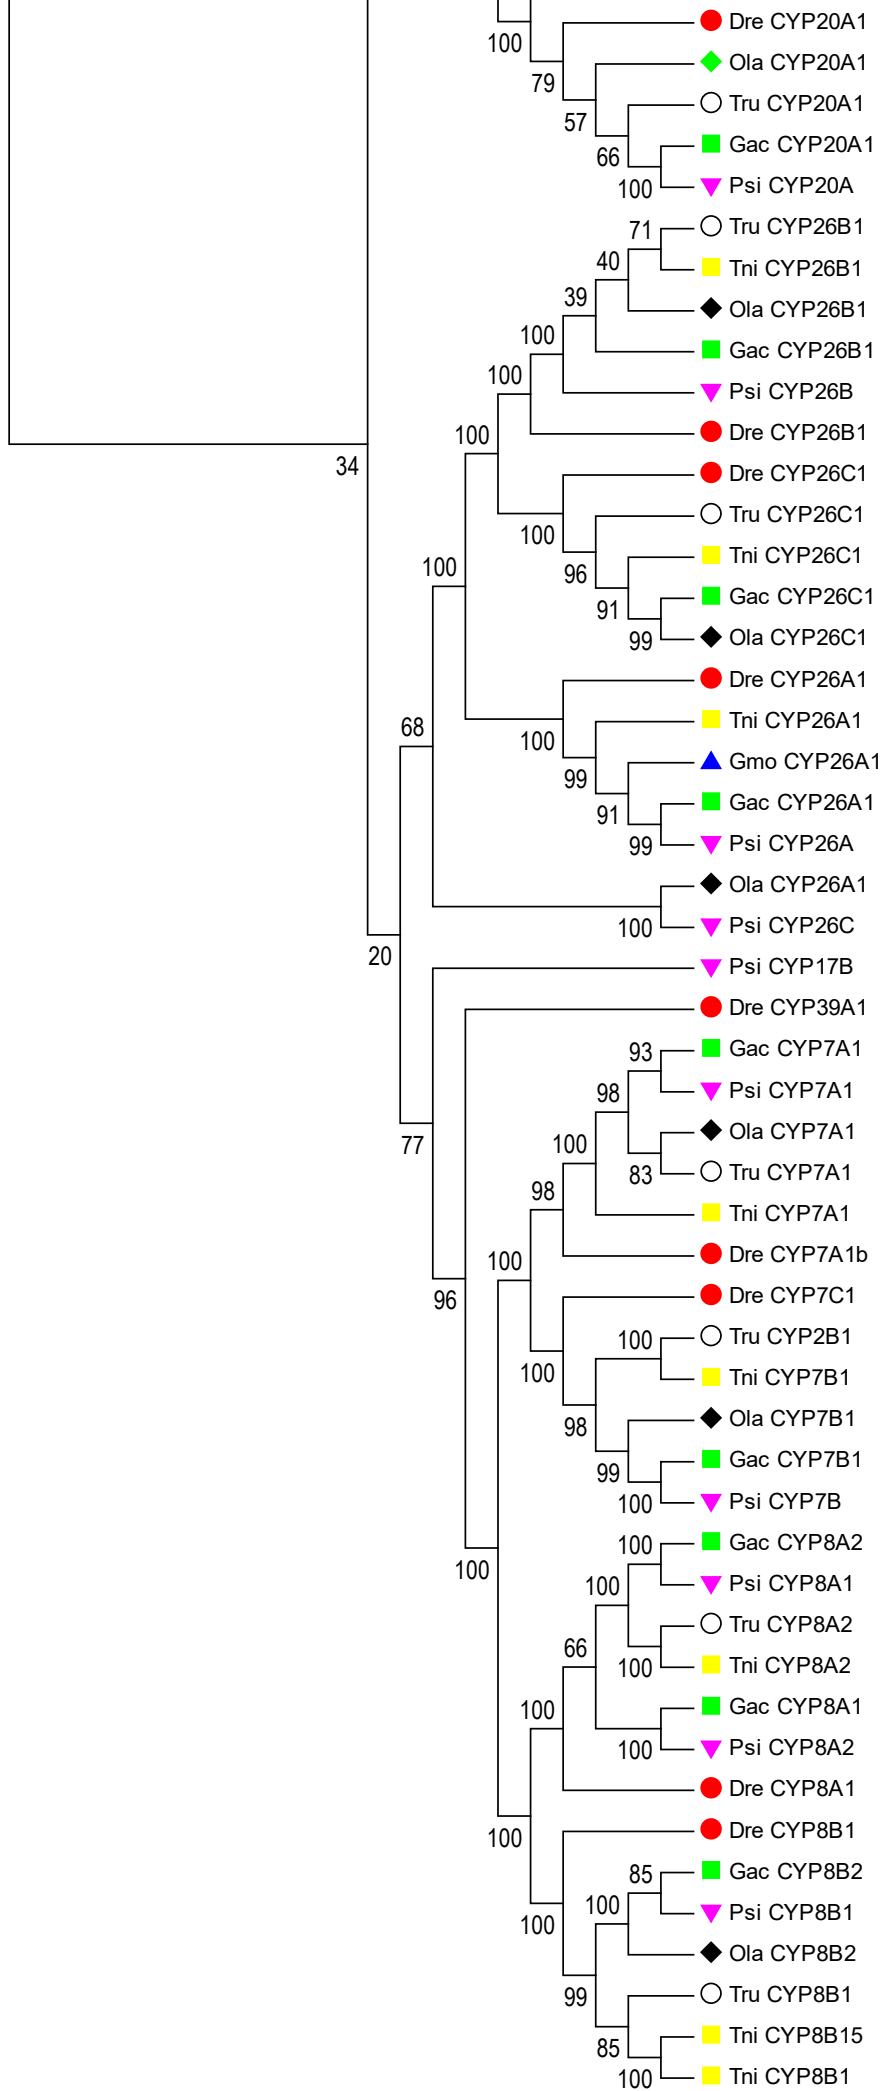

Supplement: s1 [file s1]
